# Supplementary material for: Measuring the spatiotemporal variability in snow depth in subarctic environments using UASs – Part 2: Snow processes and snow–canopy interactions
Source: Copernicus journal article supplement (doi:10.5194/tc-17-4363-2023), 2023-10-17
Supplement: Supplementary file 1 [file tc-17-4363-2023-supplement.pdf]

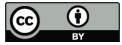

*Supplement of*

## **Measuring the spatiotemporal variability in snow depth in subarctic environments using UASs – Part 2: Snow processes and snow–canopy interactions**

**Leo-Juhani Meriö et al.**

*Correspondence to:* Leo-Juhani Meriö ([leo-juhani.merio@syke.fi](mailto:leo-juhani.merio@syke.fi))

The copyright of individual parts of the supplement might differ from the article licence.

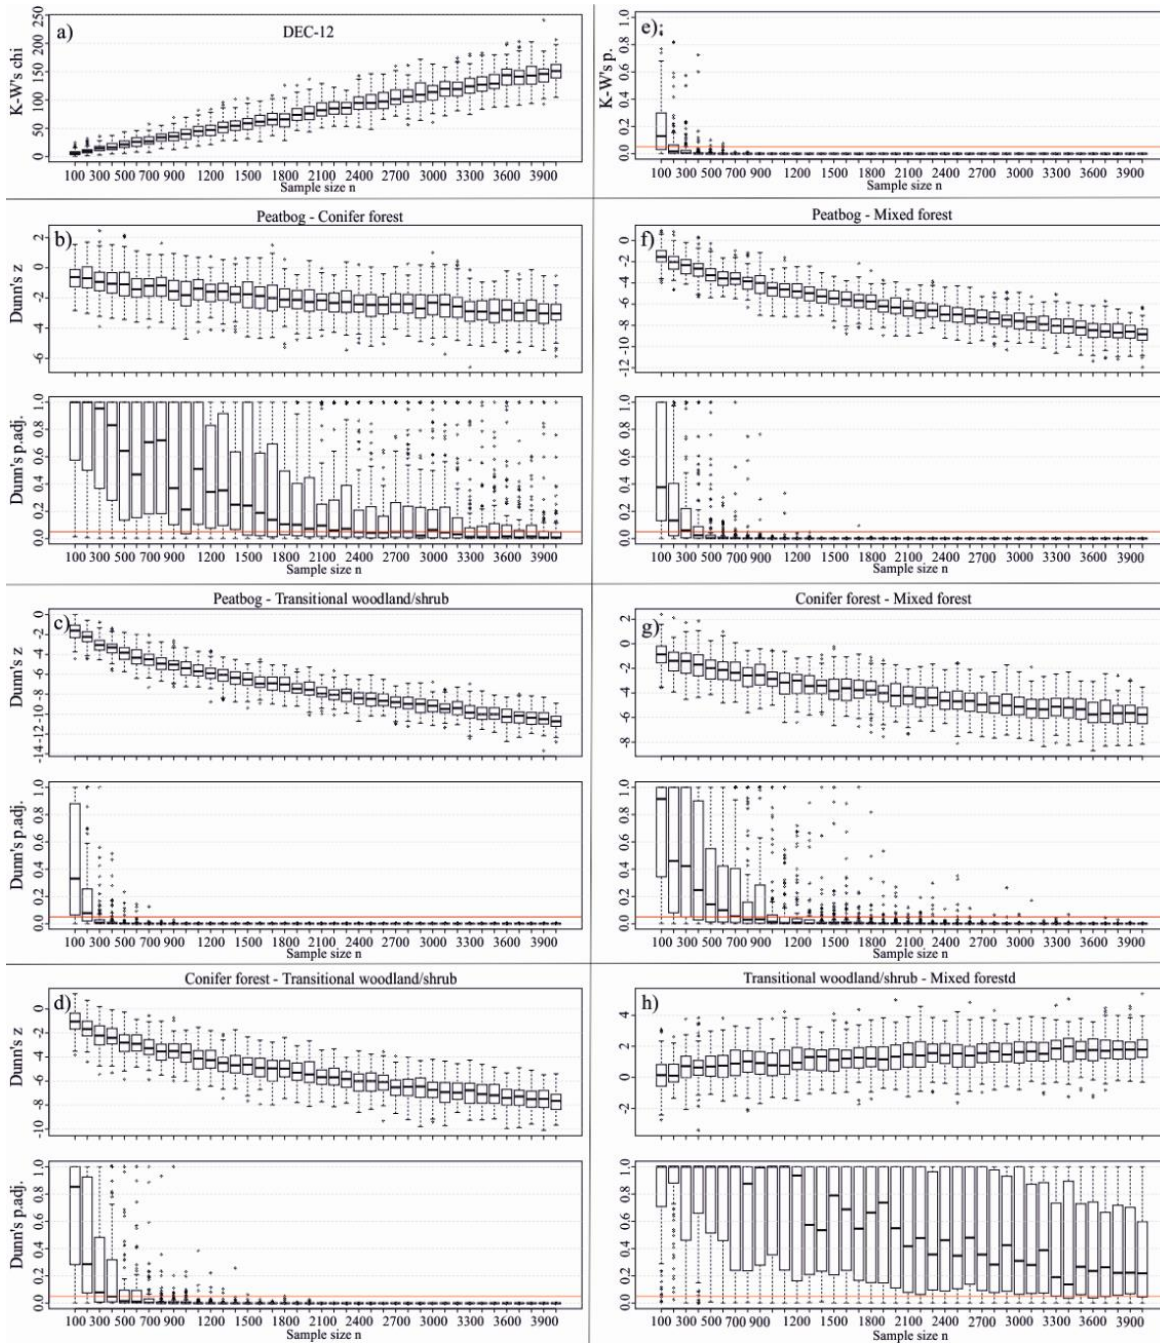

Fig. S1. Monte-Carlo run results for the difference in median snow depth between land cover types for the DEC-12 survey. Panels a) and e) show Kruskal-Wallis chi and p- values. Panels b) – d) and f) - g) show Dunn’s z statistic and Dunn’s adjusted p-value for all landcover pairs. Transitional woodland/shrub – mixed forest (panel h), and Peatbog – Conifer forest (panel b) results suggest equal median snow depth, which was also indicated for and Conifer forest – Mixed forest (panel g). The red/orange line marks 0.05 p-value.

5

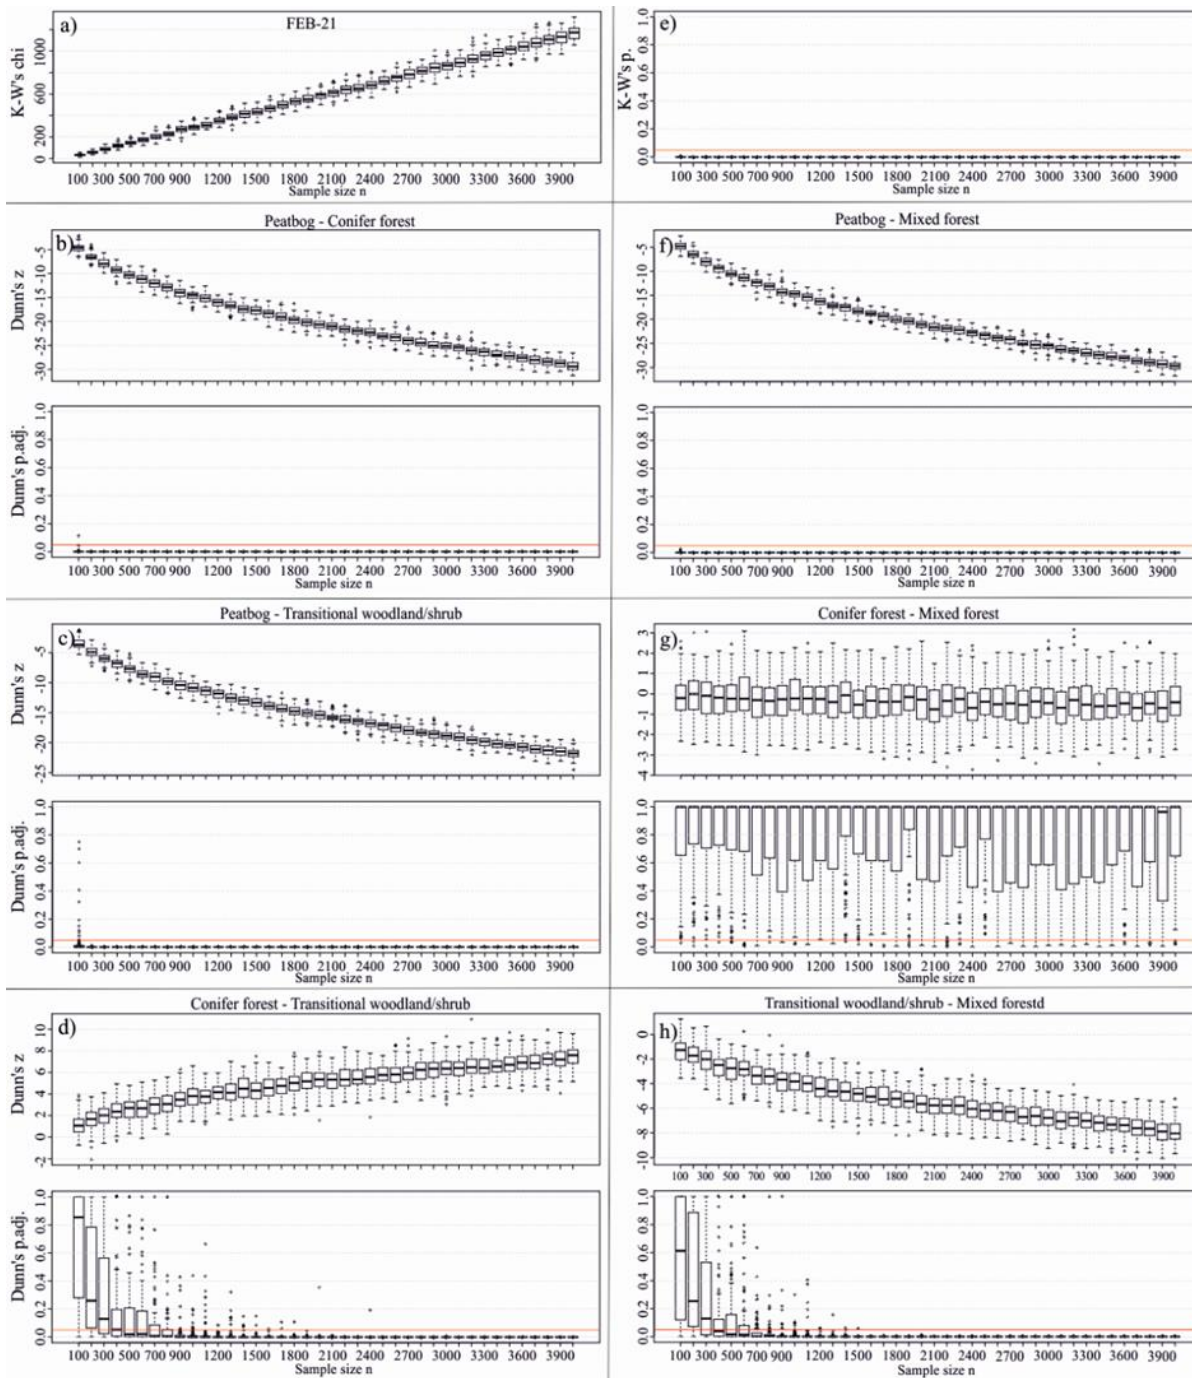

Fig. S2. Monte-Carlo run results for the difference in median snow depth between land cover types for the FEB-21 survey. Panels a) and e) show Kruskal-Wallis chi and p- values. Panels b) – d) and f) - g) show Dunn's z statistic and Dunn's adjusted p-value for all landcover pairs. Conifer forest – mixed forest (panel g) results suggest equal median snow depth, which is also indicated for Conifer forest – transitional woodland/shrub (panel d) and Transitional woodland/shrub – Mixed forest (panel h). The red/orange line marks 0.05 p-value.

10

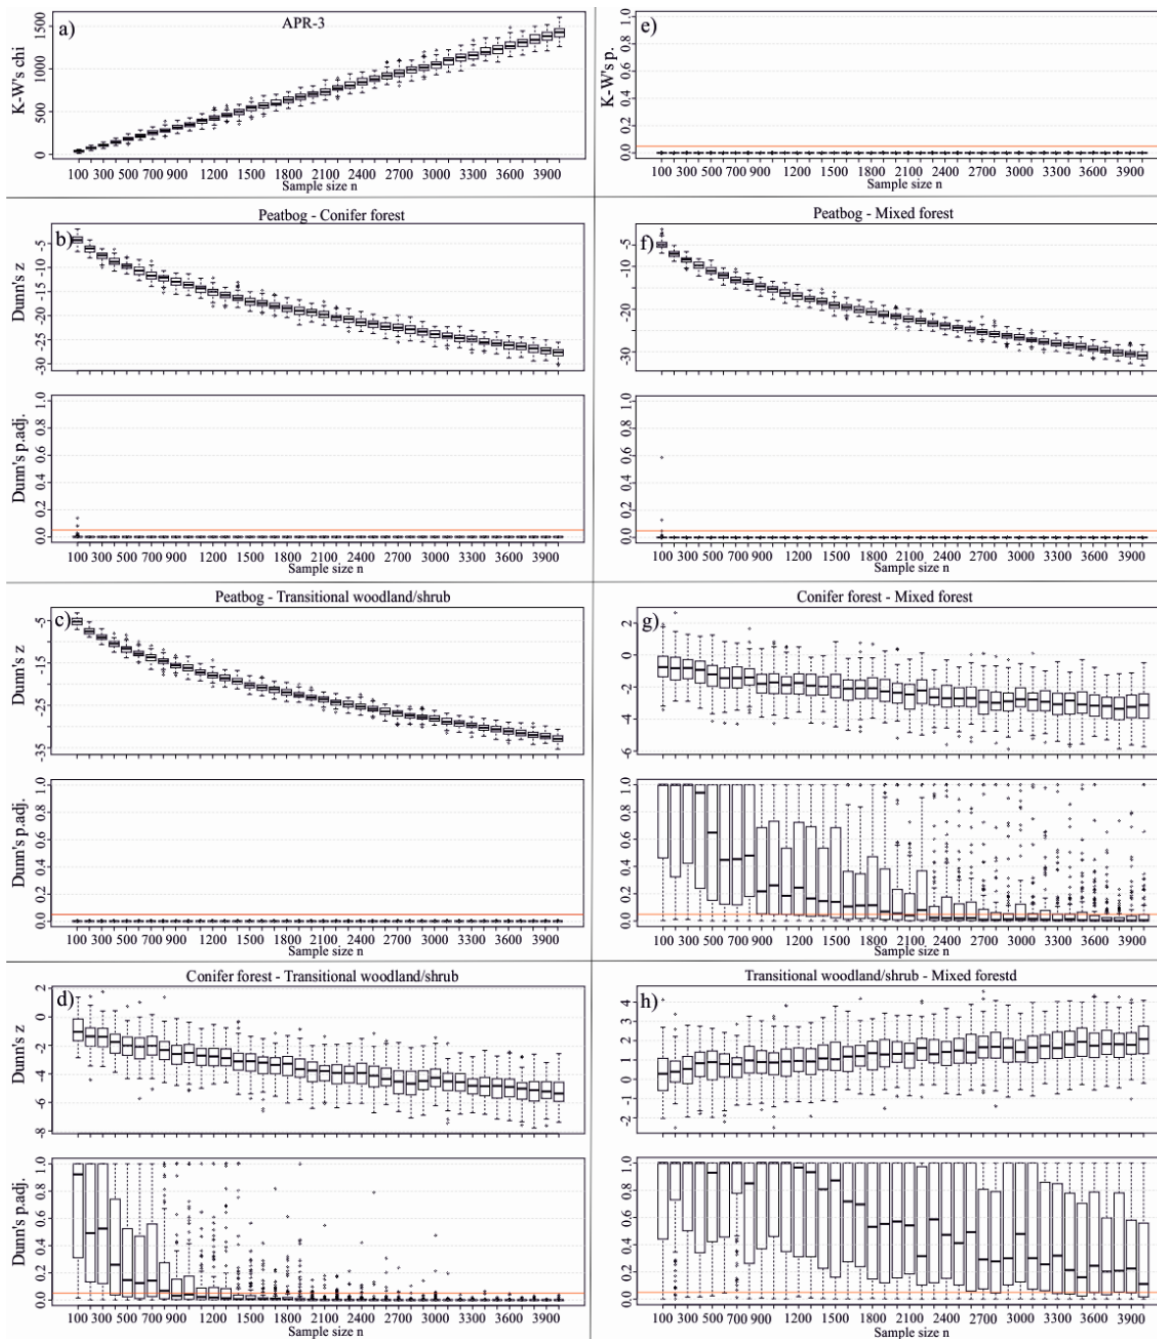

15 Fig. S3. Monte-Carlo run results for the difference in median snow depth between land cover types for the APR-3 survey. Panels a) and e) show Kruskal-Wallis chi and p- values. Panels b) – d) and f) - g) show Dunn's z statistic and Dunn's adjusted p-value for all landcover pairs. Transitional woodland – mixed forest (panel h) results indicate equal median snow depth, also indicated for Conifer forest – Mixed forest and Conifer forest – Transitional woodland/shrub. The red/orange line marks 0.05 p-value.

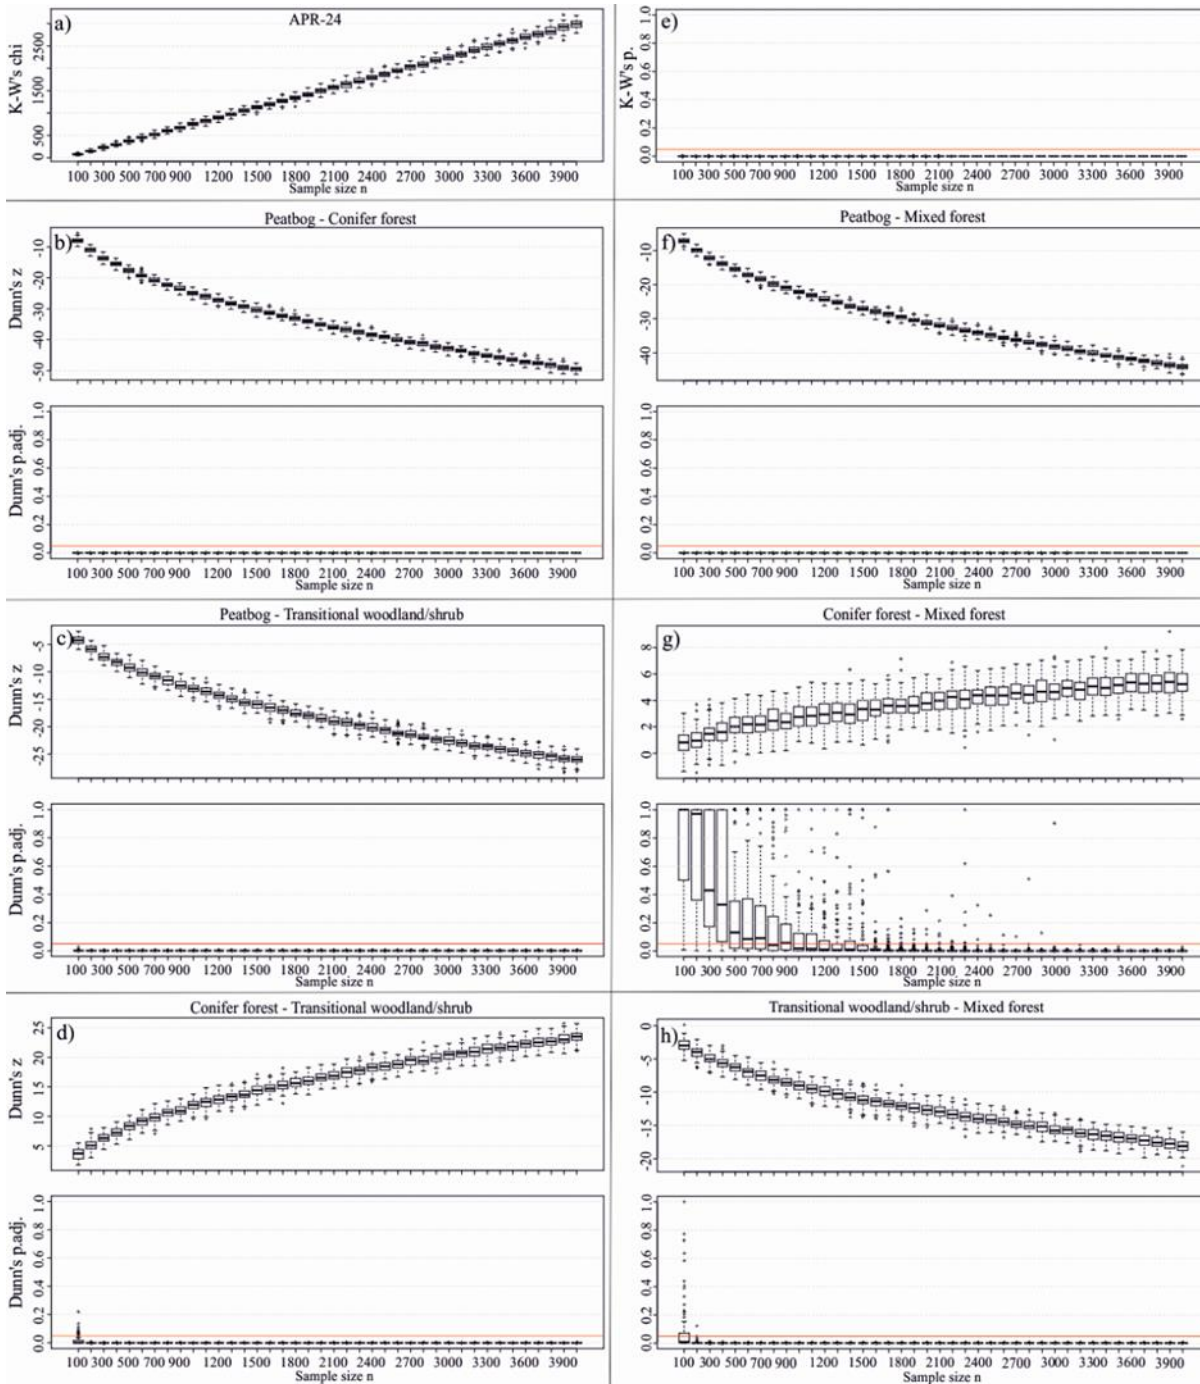

20 Fig. S4. Monte-Carlo run results for the difference in median snow depth between land cover types for the APR-24 survey. Panels a) and e) show Kruskal-Wallis chi and p-values. Panels b) – d) and f) - g) show Dunn's z statistic and Dunn's adjusted p-value for all landcover pairs. Conifer forest – Mixed forest (panel g) results indicate equal median snow depth. The red/orange line marks 0.05 p-value.
